# Supplementary material for: Dual radiosensitization and anti-STAT3 anti-proliferative strategy based on delivery of gold nanoparticle - oligonucleotide nanoconstructs to head and neck cancer cells
Source: PubMed Central journal article supplement — Nanotheranostics. 2018 Jan 1;2(1):1–11. doi: 10.7150/ntno.22335 (PMC5743834; doi:10.7150/ntno.22335), 2018-01-01
Supplement: ntnov02p0001s1.pdf [file ntnov02p0001s1.pdf]

## Supplementary information

Dual radiosensitization and anti-STAT3 anti-proliferative strategy based on delivery of gold nanoparticle - oligonucleotide nanoconstructs to head and neck cancer cells.

Surong Zhang <sup>1</sup>, Suresh Gupta <sup>1</sup>, Thomas J Fitzgerald <sup>2</sup>, Alexei A Bogdanov, Jr. <sup>1</sup>

<sup>1</sup> Laboratory of Molecular Imaging Probes, Department of Radiology, University of Massachusetts Medical School, Worcester MA; <sup>2</sup> Department of Radiation Oncology, University of Massachusetts Medical School, Worcester MA

Table S1. Sequences of aptamers and decoy ODNs used in the study

| Name    | Sequence                                                         | Notes                                            |
|---------|------------------------------------------------------------------|--------------------------------------------------|
| NUAP    | 5'-amino-C6-GGT GGT GGT GGT TGT GGT GGT GGT GGT TTT TT-C6-SSR-3' | conjugated with Cy5.5 or Alexa Fluor 488, 5'-end |
| CTAP    | 5'-amino-C6-CCT CCT CCT CCT TCT CCT CCT CCT CCT TTT TT-C6-SSR-3' | conjugated with Cy5.5 or Alexa Fluor 488, 5'-end |
| STAT-SE | 5'-amino-C6-C*A*T* TTC CCG TAA ATC TTT-C6-SSR-3'                 | conjugated with Alexa Fluor 568, 5'-end          |
| STAT-AN | 5'-G*A*T* TTA CGG GAA* A*T*G-C7-amino-3'                         | conjugated with MAG3 for radiolabeling, 3'-end   |
| COTR-SE | 5'-amino-C6-C*A*T* TTC CCT TAA ATC TTT-C6-SSR-3'                 | conjugated with Alexa Fluor 568, 5'-end          |
| COTR-AN | 5'-G*A*T* TTA AGG GAA* A*T*G-C7-amino-3'                         | conjugated with MAG3 for radiolabeling, 3'-end   |

\*- phosphorothioate bond
